# Supplementary material for: The strong association of condensed phenolic moieties in isolated lignins with their inhibition of enzymatic hydrolysis
Source: Royal Society of Chemistry journal article supplement (doi:10.1039/c6gc00685j), 2016-01-01
Supplement: c6gc00685j1.pdf [file c6gc00685j1.pdf]

## Electronic Supplementary Information (ESI)

### Strong association of condensed phenolic moieties in isolated lignin with their inhibition of enzymatic hydrolysis

Shaolong Sun,<sup>a,b</sup> Yang Huang,<sup>c</sup> Runcang Sun,<sup>a</sup> Maobing Tu<sup>\*b</sup>

---

<sup>a</sup>Beijing Key Laboratory of Lignocellulosic Chemistry, Beijing Forestry University, Beijing, 100083, China

<sup>b</sup>Department of Biomedical, Chemical and Environmental Engineering, University of Cincinnati, 2901 Woodside Drive, Cincinnati OH, 45221, U.S. Email: tumg@uc.edu

<sup>c</sup>Forest Products Laboratory and Center for Bioenergy and Bioproducts, Auburn University, 520 Devall Drive, Auburn, AL36849, U.S.

#### Table of Contents

**Fig. S1:** Correlation between  $R$  value (distribution coefficient) and the corresponding 72 h hydrolysis yield of Avicel.

**Table S1:** Particle size of the isolated lignins from hot water hydrothermal pretreatment of aspen.

**Fig. S2:** Scanning electron microscopy (SEM) of the isolated lignins from unpretreated and pretreated aspen

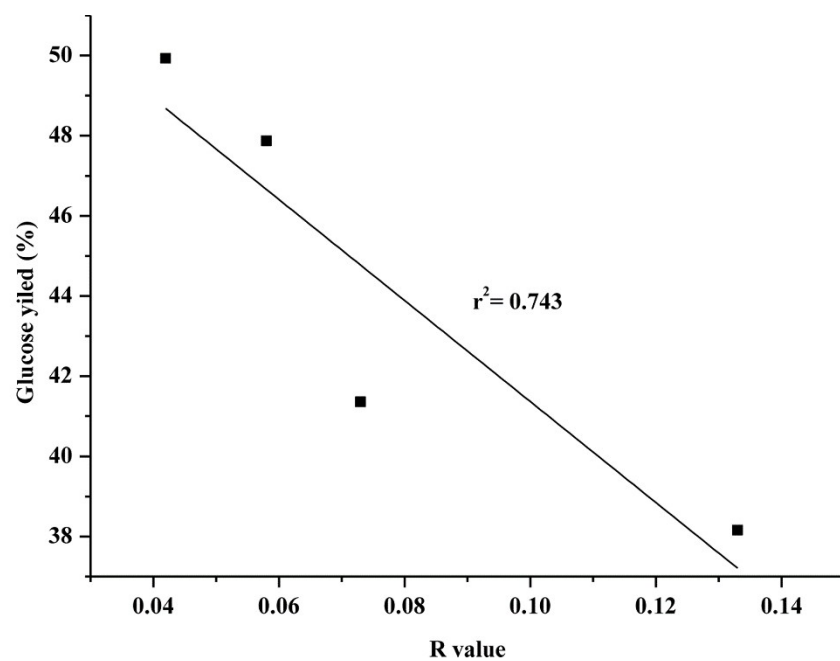

**Fig. S1.** Correlation between *R* value (distribution coefficient) and the corresponding 72 h hydrolysis yield of Avicel.

**Table S1.** Particle size of the isolated lignins.

| Samples | Z-Average (d.nm) |
|---------|------------------|
| MWL     | 6327             |
| 150-MWL | 5878             |
| 170-MWL | 3829             |
| 190-MWL | 2275             |

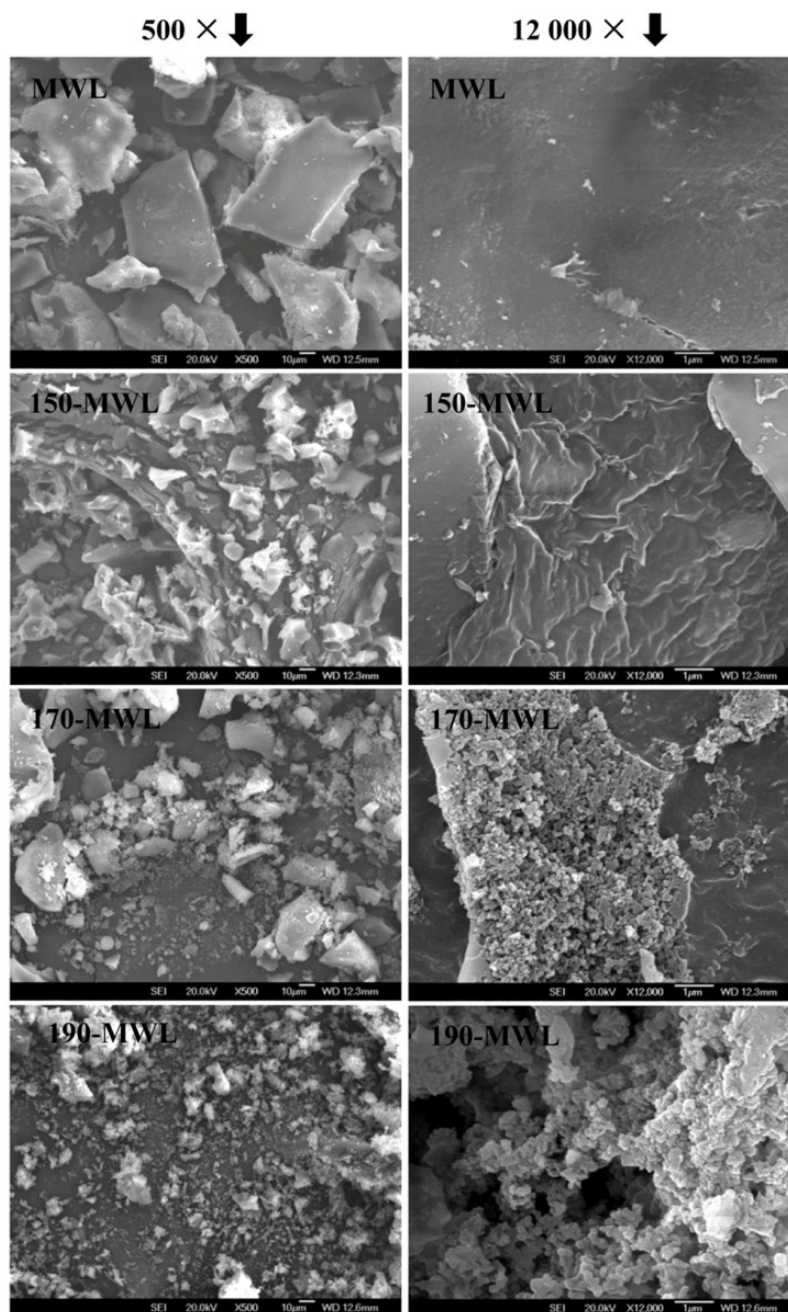

**Fig. S2** Scanning electron microscopy (SEM) of the isolated lignins from unpretreated and pretreated aspen.
